# Supplementary material for: CacyBP/SIP promotes the proliferation of colon cancer cells
Source: PubMed Central journal article supplement (PMC5308830; doi:10.1371/journal.pone.0169959), 2017-02-14
Supplement: pone.0169959.s001.pdf [file pone.0169959.s001.pdf]

S1 Table: Flow cytometry data analyses

|         |           |    | 1ST  | 2ND  | 3RD  | ADVERGE     | SD          | <i>p</i> value | <i>p</i> value |
|---------|-----------|----|------|------|------|-------------|-------------|----------------|----------------|
| HT29    | uninduced | G1 | 70.3 | 71.3 | 71.2 | 70.93333333 | 0.550757055 | 0.009169793    | 0.044211127    |
|         |           | S  | 17.5 | 14.7 | 15.1 | 15.76666667 | 1.514375559 |                |                |
|         | gastrin   | G1 | 65.5 | 66.4 | 64.8 | 65.56666667 | 0.802080628 |                |                |
|         |           | S  | 22.7 | 23.6 | 17.1 | 21.13333333 | 3.521836642 |                |                |
| HT29si  | uninduced | G1 | 77.3 | 75.7 | 80.9 | 77.96666667 | 2.663331247 | 0.619854894    | 0.005465248    |
|         |           | S  | 16.4 | 12.6 | 10.4 | 13.13333333 | 3.035347317 |                |                |
|         | gastrin   | G1 | 75.2 | 78.2 | 77.3 | 76.9        | 1.539480432 |                |                |
|         |           | S  | 16.3 | 17.9 | 12.7 | 15.63333333 | 2.663331247 |                |                |
| SW480   | uninduced | G1 | 62.9 | 62.2 | 61.4 | 62.16666667 | 0.75055535  | 0.005002059    | 0.001113725    |
|         |           | S  | 18.7 | 26.3 | 26.4 | 23.8        | 4.417012565 |                |                |
|         | gastrin   | G1 | 51.5 | 51.8 | 52.5 | 51.93333333 | 0.513160144 |                |                |
|         |           | S  | 42.6 | 34.4 | 28.3 | 35.1        | 7.17565328  |                |                |
| SW480si | uninduced | G1 | 74.5 | 75.1 | 73.2 | 74.26666667 | 0.971253486 | 0.074554701    | 0.001692808    |
|         |           | S  | 16.3 | 12.5 | 19.1 | 15.96666667 | 3.3126022   |                |                |
|         | gastrin   | G1 | 73.1 | 71.5 | 71.3 | 71.96666667 | 0.986576572 |                |                |
|         |           | S  | 14.1 | 16.9 | 14.7 | 15.23333333 | 1.474222959 |                |                |
